# Supplementary material
Source: PubMed Central journal article supplement (PMC6692639)
Supplement: BPH-176-3236-s007.pdf [file BPH-176-3236-s007.pdf]

Table S1. Information of primary hepatocytes

| Donor No. | Viability and yield                                                         | Plateability and confluence                             | Donor demographics                           |                                  |                                                                                                                                  |
|-----------|-----------------------------------------------------------------------------|---------------------------------------------------------|----------------------------------------------|----------------------------------|----------------------------------------------------------------------------------------------------------------------------------|
|           |                                                                             |                                                         | Physical                                     | Serology                         | Medical/social history                                                                                                           |
| AKB       | 94%; post-thaw viability by trypan blue exclusion 8.76 million viable cells | 0.412 OD MTT value and 90% confluent monolayer at day 5 | Age: 39<br>Gender: Female<br>Race: Caucasian | HBV: Neg<br>HCV: Neg<br>HIV: Neg | Hypertension × 3yrs-no compliant;<br>ETOH: Occasionally;<br>Tobacco: 1/2ppd×10yrs;<br>Drug: abused Rx narcotic, smoked marijuana |
| VHB       | 86%; post-thaw viability by trypan blue exclusion 8.3 million viable cells  | 0.271 OD MTT value and 80% confluent monolayer at day 5 | Age: 57<br>Gender: Female<br>Race: Caucasian | HBV: Neg<br>HCV: Neg<br>HIV: Neg | Hypertension × 0-5yrs;<br>ETOH: social;<br>Tobacco: ex-smoker× 1yr;<br>No drug use                                               |
| XSM       | 93%; post-thaw viability by trypan blue exclusion 8.37 million viable cells | 0.325 OD MTT value and 97% confluent monolayer at day 5 | Age: 59<br>Gender: Female<br>Race: Hispanic  | HBV: Neg<br>HCV: Neg<br>HIV: Neg | ETOH: no reported;<br>Tobacco: 1ppd×40yrs;<br>No drug use                                                                        |

Table S2. siRNA sequence

| <b>Name</b>   | <b>sense(5'-3')</b> |
|---------------|---------------------|
| ENT1-a-siENT1 | ACCAAGUUGGACCUCAUUA |
| ENT1-b-siENT1 | ACCAAUGAAAGCCACUCUA |
| NC            | UUCUCCGAACGUGUCACGU |

Table S3. Transition, fragmentor and collision energy of compounds

| <b>Compound</b>  | <b>Transition<br/>(m/z)</b> | <b>Fragmentor<br/>(V)</b> | <b>Collision<br/>Energy(eV)</b> |
|------------------|-----------------------------|---------------------------|---------------------------------|
| ETV              | 278/152                     | 110                       | 11                              |
| Ribavirin        | 245/113                     | 70                        | 3                               |
| cGMP             | 346/152                     | 110                       | 16                              |
| MPP <sup>+</sup> | 230/112                     | 80                        | 4                               |

Table S4.Primer list for real-time PCR

|       | Gene                  | Forward primer (5'-3')      | Reverse primer (5'-3')     |
|-------|-----------------------|-----------------------------|----------------------------|
| Human | ENT1                  | CCTGGCTTTCTCTGTCTGCT        | AGTAACGTTCCCAGGTGCTG       |
|       | ENT2                  | CCCTGGATCTTGACCTGGAG        | GGTTTTCTGGCTTCTGGG         |
|       | OAT2                  | CTAGACCTGTTCCGCACACCA       | CACATCCAGACTCAGGCCGTA      |
|       | P-gp                  | GAAATTTAGAAGATCTGATGTCAAACA | ACTGTAATAATAGGCATACCTGGTCA |
|       | BCRP                  | CCACTCCCCTGAGATTGAGA        | TGCGTTCCTAAATCCTACCC       |
|       | MRP2                  | AGTGAATGACATCTTCACGTTTG     | CTTGCAAAGGAGATCAGCAA       |
|       | MRP4                  | GAAGCGCCTGGAATCTACAA        | AGAGCCCCTGGAGAGAAGAT       |
|       | GAPDH                 | GCACCGTCAAGGCTGAGAAC        | TGGTGAAGACGCCAGTGGA        |
| Mouse | Ent1                  | GACGGAATTCTATCGCCATT        | TCCTTTTGGCTCCTCTCCTT       |
|       | Ent2                  | GCTGTCTCAGGCTCCAATC         | GATGGGAACCCCATCTTCT        |
|       | Oat2                  | CAGAATTCTTCCACCATTGC        | CAGACAAGTATCCGTACACCACA    |
|       | Oct3                  | TTCGGCTGGCAGCTATATG         | CACAGACAGACGCCAGGAT        |
|       | P-gp                  | GGGCATTTACTTCAAACCTTGTC     | TTTACAAGCTTCATTTCTAATTCAA  |
|       | Bcrp                  | GCCTTGGAGTACTTTGCATCA       | AAATCCGCAGGGTTGTTGTA       |
|       | Mrp2                  | TTTCCTGGATTACCTCCAACC       | GCCGAGCAGAAGACAATCA        |
|       | Mrp4                  | TGAAGCAACTGCAAATGTGG        | TGTGAGCAATGGTGAGCACT       |
| Gapdh | GAGACAGCCGCATCTTCTTGT | CACACCGACCTTCACCATTTT       |                            |
